# Supplementary material for: Peptide conformation and oligomerization characteristics of surface-mediated assemblies revealed by molecular dynamics simulations and scanning tunneling microscopy
Source: Royal Society of Chemistry journal article supplement (doi:10.1039/c9ra09320f), 2019-01-01
Supplement: c9ra09320f1.pdf [file c9ra09320f1.pdf]

SUPPORTING INFORMATION

**Peptide conformation and oligomerization characteristics of surface-mediated assemblies revealed by molecular dynamics simulation and scanning tunneling microscopy**

Yimin Zou<sup>a,b†</sup>, Bin Tu<sup>†</sup>, Lanlan Yu<sup>a,c</sup>, Yongfang Zheng<sup>a,c</sup>, Yuchen Lin<sup>a,b</sup>, Wendi Luo<sup>a</sup>, Yanlian Yang<sup>a†</sup>, Qiaojun Fang<sup>a†</sup> and Chen Wang<sup>a†</sup>

a. CAS Key Laboratory of Biological Effects of Nanomaterials and Nanosafety, CAS Key Laboratory of Standardization and Measurement for Nanotechnology of Nanomaterials and Nanosafety, CAS Center for Excellence in Nanoscience, CAS Center for Excellence in Brain Science, National Center for Nanoscience and Technology, Beijing 100190, P. R. China.

b. Sino-Danish Center for Education and Research, University of Chinese Academy of Sciences, Beijing, 100190, P.R. China.

c. Department of Chemistry, Tsinghua University, Beijing, 100084, P.R. China.

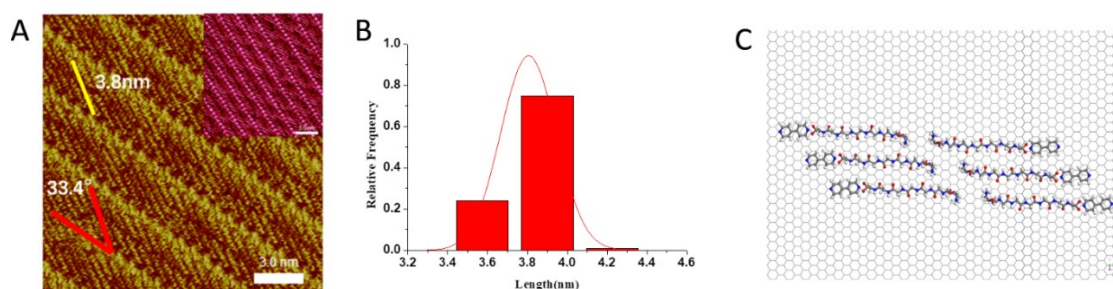

**Figure S1** High resolution STM images of G8 co-assembled with 4Bpy. Tunneling conditions: (A) 675.1 mV and 299.4 pA. (B) Statistical histograms of the peptide length of G8 measured from the STM images. The statistical histograms were fitted by Gaussian distribution (red lines) with the most probable length of the measured strands ca. 3.8 nm. (C) The supposed model for G8 assembly.

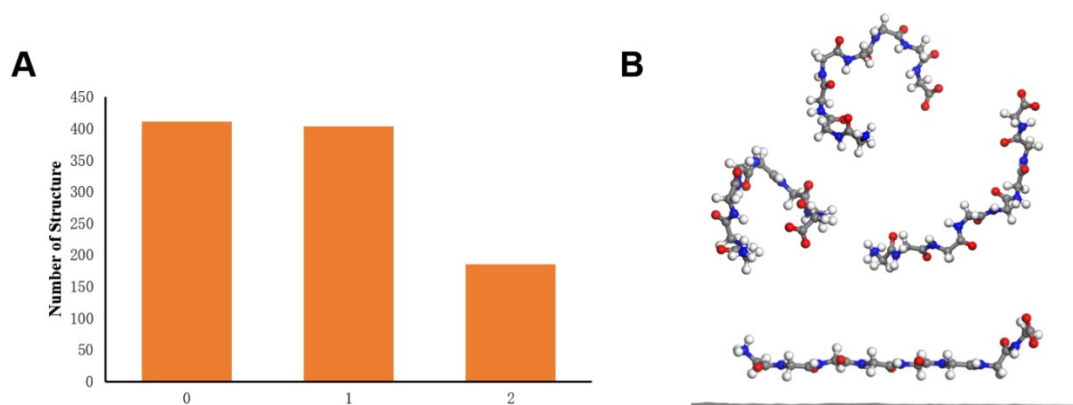

**Figure S2** (A) The cluster analysis of conformations of G8 (B) Side view of the G8-graphite system at 0 ns (top) and 60 ns (bottom) respectively.

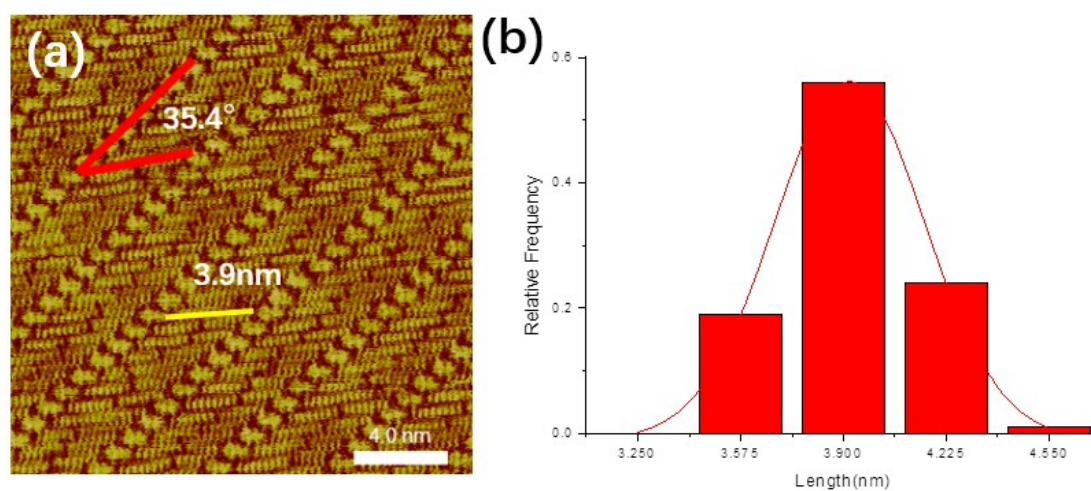

**Figure S3** (a) STM image of G9 co-assembled with 4Bpy. Tunneling conditions:  $I = 299.1$  pA,  $V = 699.8$  mV. (b) Statistical histograms of the peptide length of G9

measured from the STM images in (a). Statistical histograms were fitted by Gaussian distribution (red lines) with the most probable length of the measured strands ca. 3.9 nm.

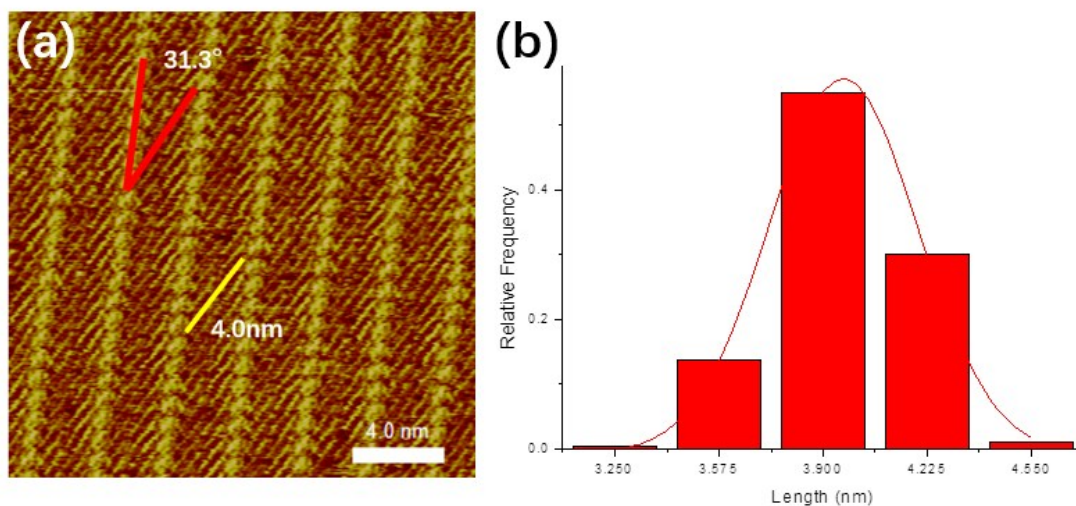

**Figure S4** (a) STM image of G11 co-assembled with 4Bpy. Tunneling conditions:  $I = 286.9$  pA,  $V = 607.6$  mV. (b) Statistical histograms of the peptide length of G11 measured from the STM images in (a). Statistical histograms were fitted by Gaussian distribution (red lines) with the most probable length of the measured strands ca. 4.0 nm.
